2020 | VOLUME 73 | NUMBER 1

# The American Journal of Psychotherapy

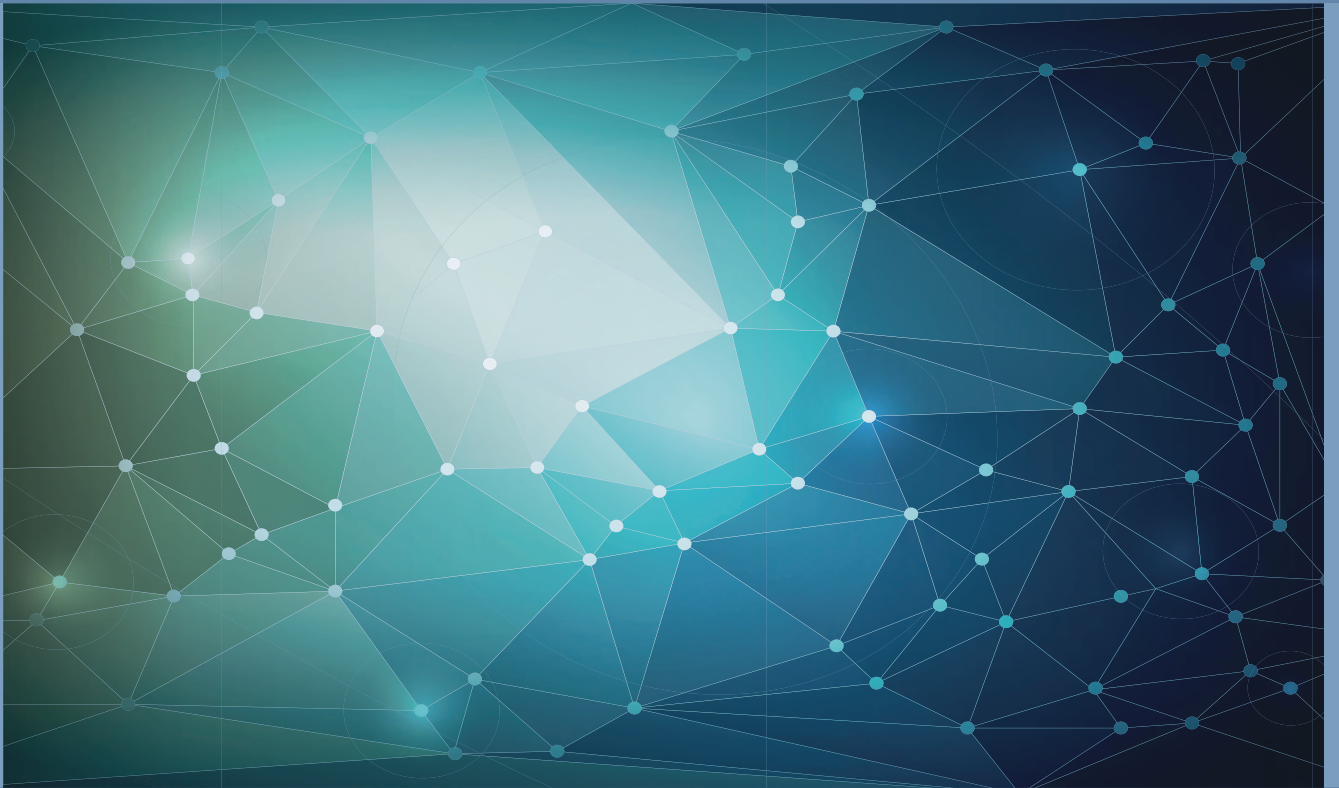

**Special Issue on Interpersonal Psychotherapy**

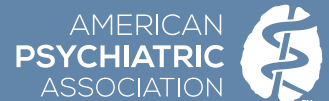

[psychotherapy.psychiatryonline.org](http://psychotherapy.psychiatryonline.org)
